# Supplementary material
Source: ML conference proceedings conference paper supplement (https://openaccess.thecvf.com/content/cvpr_2017/html/Gan_Semantic_Compositional_Networks_2017_CVPR_paper.html)
Supplement: Supplementary file 1 [file Gan_Semantic_Compositional_Networks_2017_CVPR_supplemental.pdf]

# Semantic Compositional Networks for Visual Captioning: Supplementary Material

Zhe Gan<sup>†</sup>, Chuang Gan<sup>\*</sup>, Xiaodong He<sup>‡</sup>, Yunchen Pu<sup>†</sup>  
Kenneth Tran<sup>‡</sup>, Jianfeng Gao<sup>‡</sup>, Lawrence Carin<sup>†</sup>, Li Deng<sup>‡</sup>

<sup>†</sup>Duke University, <sup>\*</sup>Tsinghua University, <sup>‡</sup>Microsoft Research, Redmond, WA 98052, USA

{zhe.gan, yunchen.pu, lcarin}@duke.edu, ganchuang1990@gmail.com

{xiaohe, ktran, jfgao, deng}@microsoft.com

## A. More results for Figure 4

|                                                                                                                                                                          |                                                                                                                                                     |                                                                                                                                                                         |                                                                                                                                                       |                                                                                                                                                                    |                                                                                                                                                       |
|--------------------------------------------------------------------------------------------------------------------------------------------------------------------------|-----------------------------------------------------------------------------------------------------------------------------------------------------|-------------------------------------------------------------------------------------------------------------------------------------------------------------------------|-------------------------------------------------------------------------------------------------------------------------------------------------------|--------------------------------------------------------------------------------------------------------------------------------------------------------------------|-------------------------------------------------------------------------------------------------------------------------------------------------------|
|                                                                                         | <p><b>Tags:</b><br/>outdoor (1), elephant (0.995), animal (0.988), grass (0.962), standing (0.89), rock (0.781), zoo (0.682), enclosure (0.619)</p> |                                                                                        | <p><b>Tags:</b><br/>indoor (0.966), table (0.919), food (0.849), kitchen (0.714), sitting (0.545), counter (0.436), top (0.285), doughnut (0.251)</p> |                                                                                 | <p><b>Tags:</b><br/>outdoor (0.998), building (0.996), man (0.613), front (0.434), standing (0.333), woman (0.255), walking (0.249), next (0.247)</p> |
| <p><b>Generated captions:</b><br/><b>SCN-LSTM-T:</b> a couple of elephants standing next to each other<br/><b>SCN-LSTM:</b> a large elephant standing next to a tree</p> |                                                                                                                                                     | <p><b>Generated captions:</b><br/><b>SCN-LSTM-T:</b> a kitchen with a lot of food on it<br/><b>SCN-LSTM:</b> a bunch of doughnuts sitting on top of a counter</p>       |                                                                                                                                                       | <p><b>Generated captions:</b><br/><b>SCN-LSTM-T:</b> a man standing in front of a building<br/><b>SCN-LSTM:</b> a statue of a man standing next to a building</p>  |                                                                                                                                                       |
|                                                                                       | <p><b>Tags:</b><br/>table (0.997), indoor (0.893), chair (0.876), room (0.692), sitting (0.583), window (0.58), wooden (0.542), small (0.344)</p>   |                                                                                      | <p><b>Tags:</b><br/>fence (1), giraffe (0.994), animal (0.921), wooden (0.677), fenced (0.66), standing (0.592), next (0.493), zoo (0.442)</p>        |                                                                               | <p><b>Tags:</b><br/>grass (1), outdoor (0.992), giraffe (0.985), mammal (0.98), animal (0.978), field (0.93), eating (0.558), standing (0.508)</p>    |
| <p><b>Generated captions:</b><br/><b>SCN-LSTM-T:</b> a dining room with a table and chairs<br/><b>SCN-LSTM:</b> a wooden table with a laptop on it</p>                   |                                                                                                                                                     | <p><b>Generated captions:</b><br/><b>SCN-LSTM-T:</b> a giraffe standing next to a wooden fence<br/><b>SCN-LSTM:</b> a couple of giraffe standing next to each other</p> |                                                                                                                                                       | <p><b>Generated captions:</b><br/><b>SCN-LSTM-T:</b> a giraffe standing on top of a lush green field<br/><b>SCN-LSTM:</b> a giraffe is eating grass in a field</p> |                                                                                                                                                       |

Figure 1: Detected tags and sentence generation results on COCO. The output captions are generated by: 1) SCN-LSTM, and 2) SCN-LSTM-T, a SCN-LSTM model without the visual feature inputs, *i.e.*, with only tag inputs.

## B. More results on image captioning

|                                                                                                                                                                                                                       |                                                                                                                                      |                                                                                                                                                                                                                                    |                                                                                                                                            |                                                                                                                                                                                                                                                        |                                                                                                                                                     |
|-----------------------------------------------------------------------------------------------------------------------------------------------------------------------------------------------------------------------|--------------------------------------------------------------------------------------------------------------------------------------|------------------------------------------------------------------------------------------------------------------------------------------------------------------------------------------------------------------------------------|--------------------------------------------------------------------------------------------------------------------------------------------|--------------------------------------------------------------------------------------------------------------------------------------------------------------------------------------------------------------------------------------------------------|-----------------------------------------------------------------------------------------------------------------------------------------------------|
|                                                                                                                                      | <b>Tags:</b><br>polar (0.999), rock (0.998), animal (0.997), bear (0.993), mammal (0.988), zoo (0.881), white (0.779), large (0.748) |                                                                                                                                                   | <b>Tags:</b><br>refrigerator (0.992), food (0.976), open (0.97), cabinet (0.953), shelf (0.582), filled (0.45), door (0.426), lots (0.329) |                                                                                                                                                                     | <b>Tags:</b><br>person (0.925), building (0.839), people (0.787), umbrella (0.779), group (0.704), child (0.519), standing (0.369), holding (0.272) |
| <b>Generated captions:</b><br><b>LSTM-R:</b> a polar bear standing on top of a rock<br><b>LSTM-RT<sub>2</sub>:</b> a polar bear standing on a rock<br><b>SCN-LSTM:</b> a large white polar bear standing on a rock    |                                                                                                                                      | <b>Generated captions:</b><br><b>LSTM-R:</b> a display case filled with lots of food<br><b>LSTM-RT<sub>2</sub>:</b> a shelf full of different kinds of food<br><b>SCN-LSTM:</b> a refrigerator filled with lots of food and drinks |                                                                                                                                            | <b>Generated captions:</b><br><b>LSTM-R:</b> a group of people standing next to each other<br><b>LSTM-RT<sub>2</sub>:</b> a group of people standing in front of an umbrella<br><b>SCN-LSTM:</b> a group of people standing in the rain with umbrellas |                                                                                                                                                     |
|                                                                                                                                      | <b>Tags:</b><br>bicycle (1), parked (0.923), next (0.889), group (0.829), sidewalk (0.783), many (0.698), lot (0.611), rack (0.596)  |                                                                                                                                                   | <b>Tags:</b><br>food (0.939), oranges (0.839), fruit (0.836), slice (0.792), sliced (0.783), orange (0.764), plate (0.759), table (0.704)  |                                                                                                                                                                     | <b>Tags:</b><br>clock (1), building (0.999), large (0.902), station (0.876), mounted (0.644), sitting (0.621), tower (0.574), building (0.418)      |
| <b>Generated captions:</b><br><b>LSTM-R:</b> a group of motorcycles parked next to each other<br><b>LSTM-RT<sub>2</sub>:</b> a row of bikes parked in a row<br><b>SCN-LSTM:</b> a bunch of bikes parked in a park lot |                                                                                                                                      | <b>Generated captions:</b><br><b>LSTM-R:</b> a bowl of fruit sitting on top of a table<br><b>LSTM-RT<sub>2</sub>:</b> a bunch of oranges sitting on a table<br><b>SCN-LSTM:</b> a bunch of oranges sitting on a plate              |                                                                                                                                            | <b>Generated captions:</b><br><b>LSTM-R:</b> a clock on the wall of a building<br><b>LSTM-RT<sub>2</sub>:</b> a clock on the side of a building<br><b>SCN-LSTM:</b> a large clock mounted to the side of a building                                    |                                                                                                                                                     |
|                                                                                                                                     | <b>Tags:</b><br>dog (1), water (0.998), beach (0.805), standing (0.666), walking (0.451), next (0.435), ocean (0.301), white (0.225) |                                                                                                                                                  | <b>Tags:</b><br>water (0.985), beach (0.975), ocean (0.655), next (0.493), shore (0.324), sand (0.288), sandy (0.209), bench(0.204)        |                                                                                                                                                                    | <b>Tags:</b><br>bench (0.997), fence (0.98), park (0.974), grass (0.877), sitting (0.771), wooden (0.582), next (0.511), green (0.377)              |
| <b>Generated captions:</b><br><b>LSTM-R:</b> a dog that is playing with a frisbee<br><b>LSTM-RT<sub>2</sub>:</b> a couple of dogs standing on a beach<br><b>SCN-LSTM:</b> a white dog walking on a beach              |                                                                                                                                      | <b>Generated captions:</b><br><b>LSTM-R:</b> a bench that is sitting on the beach<br><b>LSTM-RT<sub>2</sub>:</b> a person sitting on a bench on a beach<br><b>SCN-LSTM:</b> a wooden bench sitting on top of a sandy beach         |                                                                                                                                            | <b>Generated captions:</b><br><b>LSTM-R:</b> a park bench sitting in the middle of a forest<br><b>LSTM-RT<sub>2</sub>:</b> a park bench sitting on a park bench<br><b>SCN-LSTM:</b> a wooden bench sitting in the middle of a park                     |                                                                                                                                                     |
|                                                                                                                                    | <b>Tags:</b><br>road (0.958), street (0.911), green (0.856), sign (0.601), traffic (0.549), car (0.401), truck (0.382), city (0.374) |                                                                                                                                                 | <b>Tags:</b><br>person (0.958), woman (0.728), sitting (0.708), bench (0.394), people (0.381), next (0.371), group (0.361), front (0.311)  |                                                                                                                                                                   | <b>Tags:</b><br>person (0.932), man (0.787), young (0.458), black (0.439), white (0.43), jumping (0.342), riding (0.242), trick (0.156)             |
| <b>Generated captions:</b><br><b>LSTM-R:</b> a bus that is driving down the road<br><b>LSTM-RT<sub>2</sub>:</b> a bus parked on the side of a road<br><b>SCN-LSTM:</b> a green bus driving down a city street         |                                                                                                                                      | <b>Generated captions:</b><br><b>LSTM-R:</b> a couple of women standing next to each other<br><b>LSTM-RT<sub>2</sub>:</b> a couple of people sitting on a toilet<br><b>SCN-LSTM:</b> a group of people sitting on a bench          |                                                                                                                                            | <b>Generated captions:</b><br><b>LSTM-R:</b> a man sitting on top of a wooden bench<br><b>LSTM-RT<sub>2</sub>:</b> a man riding a skateboard down a street<br><b>SCN-LSTM:</b> a black and white photo of a skateboarder doing a trick                 |                                                                                                                                                     |

Figure 2: Detected tags and sentences generation results on COCO. The output captions are generated by: 1) LSTM-R, 2) LSTM-RT<sub>2</sub>, and 3) our SCN-LSTM.

### C. More results on video captioning

|                                                                                                                                                                                            |                                                                                                                                                                                    |                                                                                                                                                                                                            |
|--------------------------------------------------------------------------------------------------------------------------------------------------------------------------------------------|------------------------------------------------------------------------------------------------------------------------------------------------------------------------------------|------------------------------------------------------------------------------------------------------------------------------------------------------------------------------------------------------------|
| 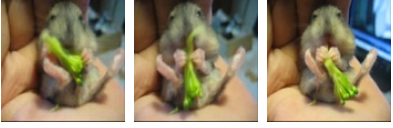                                                                                                          |                                                                                                   |                                                                                                                         |
| <p><b>Tags:</b><br/>playing (0.694), animal (0.673), baby (0.63), person (0.471), eating (0.419), something (0.333), food (0.329), hand (0.311)</p>                                        | <p><b>Tags:</b><br/>man (0.807), person (0.733), car (0.442), driving (0.39), playing (0.382), road (0.365), moving (0.189), pushing (0.129)</p>                                   | <p><b>Tags:</b><br/>woman (0.88), girl (0.732), lady (0.699), making (0.516), something (0.501), water (0.267), glass (0.244), drinking (0.204)</p>                                                        |
| <p><b>Generated captions:</b><br/><b>LSTM-CR:</b> a person is eating<br/><b>LSTM-CRT<sub>2</sub>:</b> a person is holding a small animal<br/><b>SCN-LSTM:</b> a small animal is eating</p> | <p><b>Generated captions:</b><br/><b>LSTM-CR:</b> a man is doing a wheelie<br/><b>LSTM-CRT<sub>2</sub>:</b> a man is riding a bike<br/><b>SCN-LSTM:</b> a man is pushing a car</p> | <p><b>Generated captions:</b><br/><b>LSTM-CR:</b> a woman is pouring sugar in a glass<br/><b>LSTM-CRT<sub>2</sub>:</b> a woman is pouring water<br/><b>SCN-LSTM:</b> a woman is drinking something</p>     |
|                                                                                                           |                                                                                                   |                                                                                                                         |
| <p><b>Tags:</b><br/>man (0.635), woman (0.545), riding (0.541), person (0.465), water (0.465), girl (0.4), doing (0.387), horse (0.132)</p>                                                | <p><b>Tags:</b><br/>man (0.843), person (0.774), doing (0.393), playing (0.385), open (0.298), gun (0.283), shooting (0.276), field (0.259)</p>                                    | <p><b>Tags:</b><br/>man (0.958), song (0.869), stage (0.866), singing (0.859), men (0.845), music (0.826), playing (0.762), guitar (0.759)</p>                                                             |
| <p><b>Generated captions:</b><br/><b>LSTM-CR:</b> a girl is riding a horse<br/><b>LSTM-CRT<sub>2</sub>:</b> a woman is riding a horse<br/><b>SCN-LSTM:</b> a man is riding a horse</p>     | <p><b>Generated captions:</b><br/><b>LSTM-CR:</b> a girl is firing a gun<br/><b>LSTM-CRT<sub>2</sub>:</b> a girl is shooting<br/><b>SCN-LSTM:</b> a man is shooting a gun</p>      | <p><b>Generated captions:</b><br/><b>LSTM-CR:</b> a group of people are dancing on stage<br/><b>LSTM-CRT<sub>2</sub>:</b> a man is dancing on stage<br/><b>SCN-LSTM:</b> a band is performing on stage</p> |
|                                                                                                         |                                                                                                 |                                                                                                                       |
| <p><b>Tags:</b><br/>doing (0.616), boy (0.557), room (0.554), playing (0.51), floor (0.493), dancing (0.491), dance (0.361), kid (0.281)</p>                                               | <p><b>Tags:</b><br/>woman (0.829), girl (0.743), doing (0.593), using (0.408), makeup (0.211), applying (0.2), face (0.171), hand (0.139)</p>                                      | <p><b>Tags:</b><br/>playing (0.776), dog (0.625), floor (0.423), trying (0.399), woman (0.356), running (0.293), puppy (0.202), toy (0.182)</p>                                                            |
| <p><b>Generated captions:</b><br/><b>LSTM-CR:</b> a baby is walking<br/><b>LSTM-CRT<sub>2</sub>:</b> a baby is dancing<br/><b>SCN-LSTM:</b> a boy is dancing</p>                           | <p><b>Generated captions:</b><br/><b>LSTM-CR:</b> a girl is singing<br/><b>LSTM-CRT<sub>2</sub>:</b> a woman is playing<br/><b>SCN-LSTM:</b> a woman is plucking her eyebrow</p>   | <p><b>Generated captions:</b><br/><b>LSTM-CR:</b> a group of girls are playing with a toy<br/><b>LSTM-CRT<sub>2</sub>:</b> the children are playing<br/><b>SCN-LSTM:</b> a dog is playing with a toy</p>   |

Figure 3: Detected tags and sentence generation results on Youtube2Text. The output captions are generated by: 1) LSTM-CR, 2) LSTM-CRT<sub>2</sub>, and 3) our SCN-LSTM.
